# Supplementary material for: A Novel Sodium–Potassium Anode Supported by Fluorinated Aluminum Foam
Source: MDPI journal article supplement (doi:10.3390/ma16237269), 2023-11-22
Supplement: s1 [file s1]

# A Novel Sodium–Potassium Anode Supported by Fluorinated Aluminum Foam

Jin Lou <sup>1,\*</sup>, Jingan Zhou <sup>2</sup>, Xiaosong Ma <sup>2</sup>, Kanghua Chen <sup>1</sup> and Songyi Chen <sup>1</sup>

<sup>1</sup> Light Alloy Metal Research Institute, Central South University, Changsha 410083, China; khchen@csu.edu.cn (K.C.); sychen08@csu.edu.cn (S.C.)

<sup>2</sup> Hunan Provincial Key Laboratory of Carbon Neutrality and Intelligent Energy, School of Resources & Environment, Hunan University of Technology and Business, Changsha 410205, China; 17373564507@163.com (J.Z.); ma15367552578@163.com (X.M.)

\* Correspondence: jinlou@csu.edu.cn

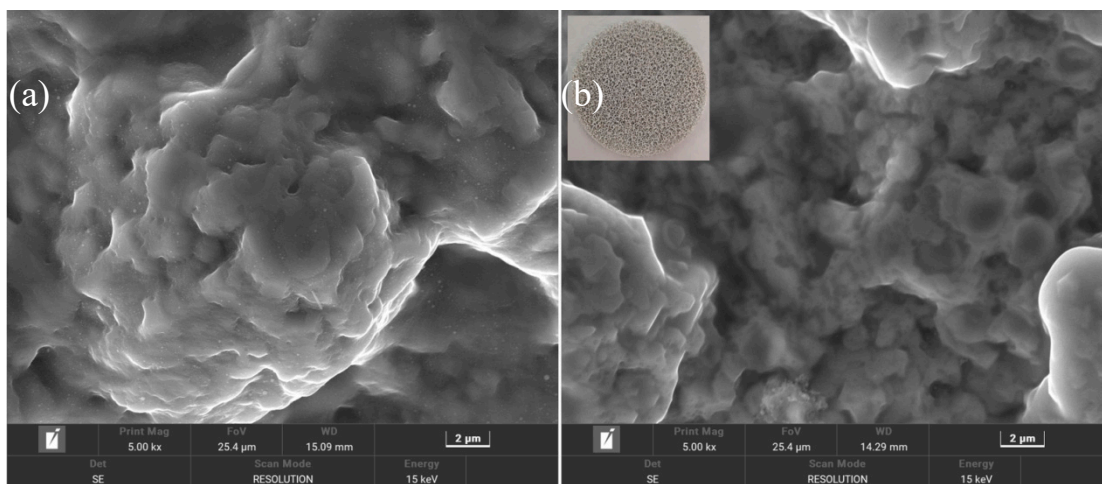

**Figure S1.** The SEM/photographic images of (a) pristine Al foam and (b) FAF.

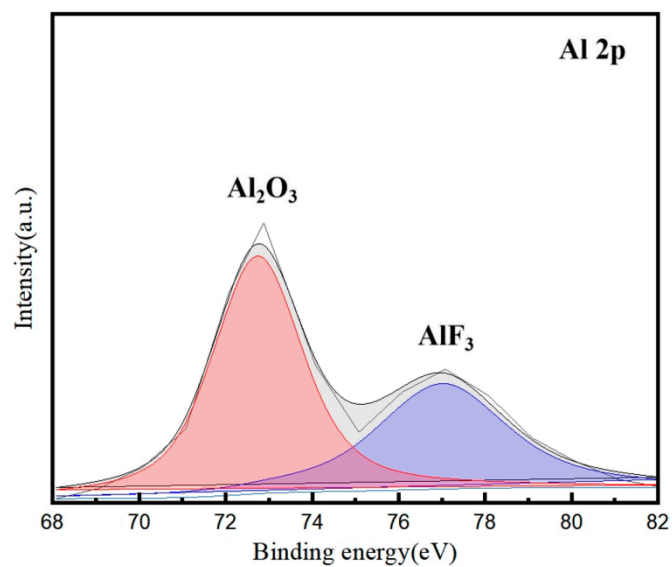

**Figure S2.** X-ray photoelectron spectroscopy (XPS) spectra of the Al element of FAF electrode.

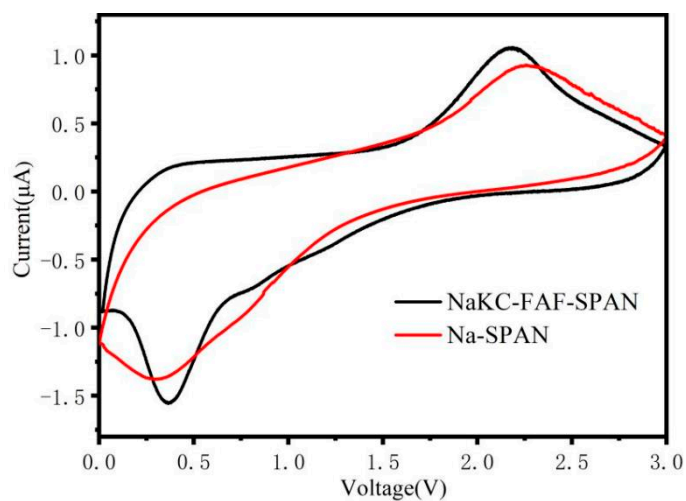

**Figure S3.** The CV curves of Na-SPAN/NaKC-FAF-SPAN at 0.1 mV s<sup>-1</sup>

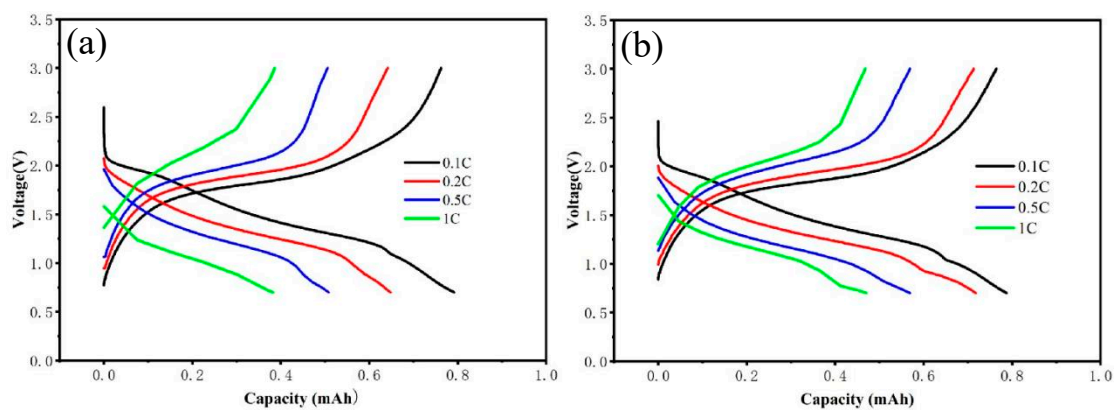

**Figure S4.** The Discharge-Charge profile during the rate performance: (a) Na-SPAN, (b) NaKC-FAF-SPAN.

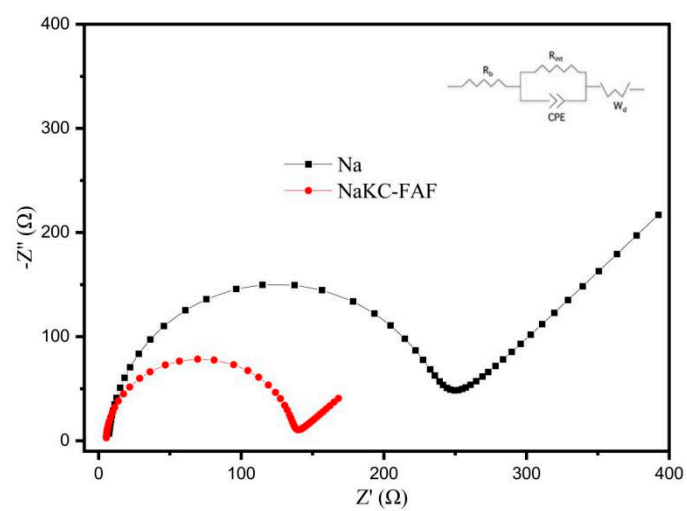

**Figure S5.** AC impedance test of Na-SPAN and NaKC-FAF-SPAN cells after 500<sup>th</sup> cycling

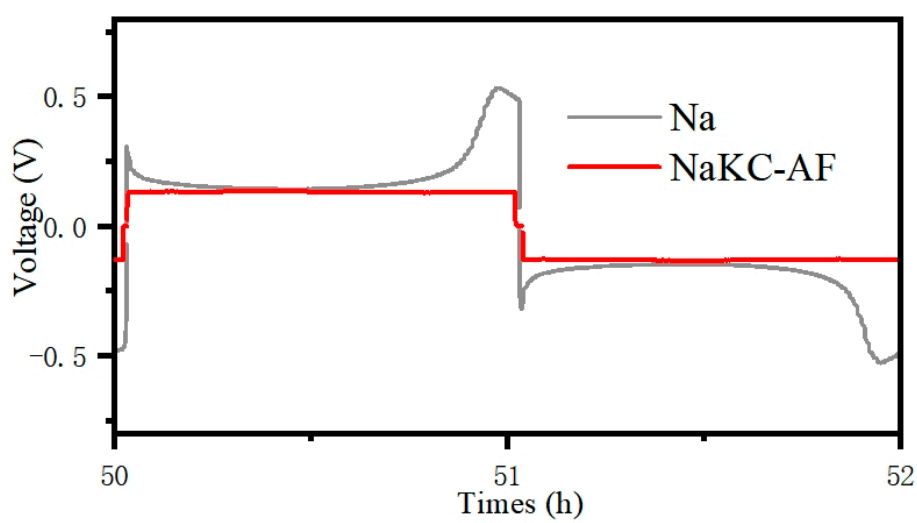

**Figure S6.** The polarization voltage of the symmetrical battery
